# Supplementary material for: Contribution of a Seeded Cover Crop Mixture on Biomass Production and Nutrition Status Compared to Natural Vegetation in a Mediterranean Olive Grove
Source: MDPI journal article supplement (doi:10.3390/ijpb13030020), 2022-07-25
Supplement: s1 [file s1]

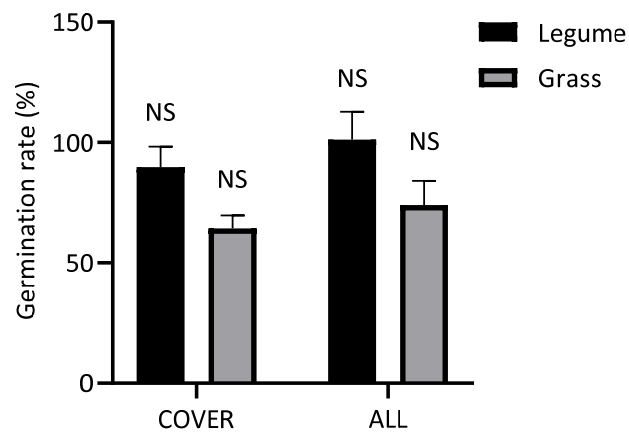

**Figure S1.** Germination rate of legume and grass cover crops in COVER and ALL treatments. Mean values  $\pm$  SE per each treatment is presented. Different letters indicate significance at  $P < 0.05$  (LSD test).
